# Supplementary material
Source: PubMed Central journal article supplement (PMC137747)

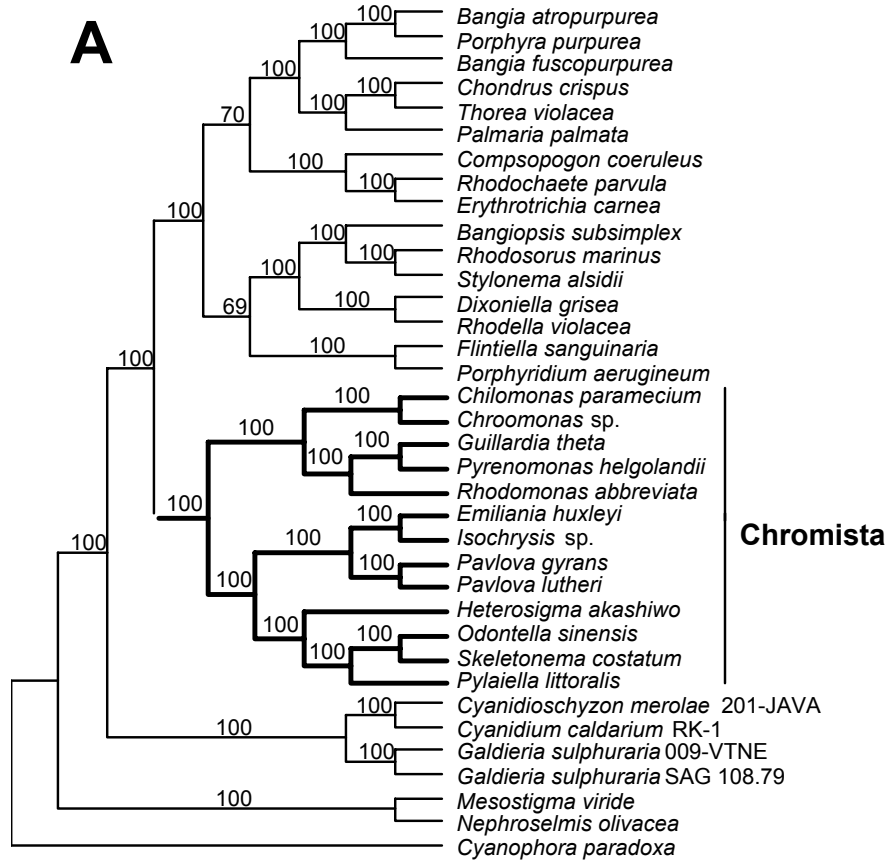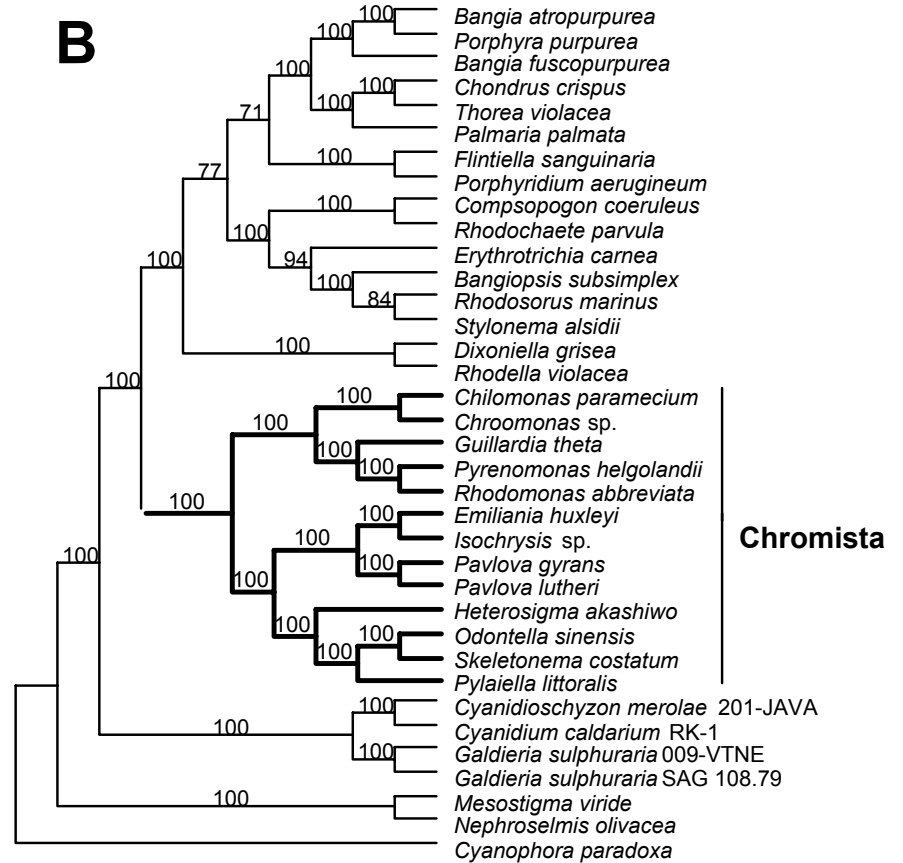

Supplement: pnas_242379899_4.pdf [file pnas_242379899_4.pdf]

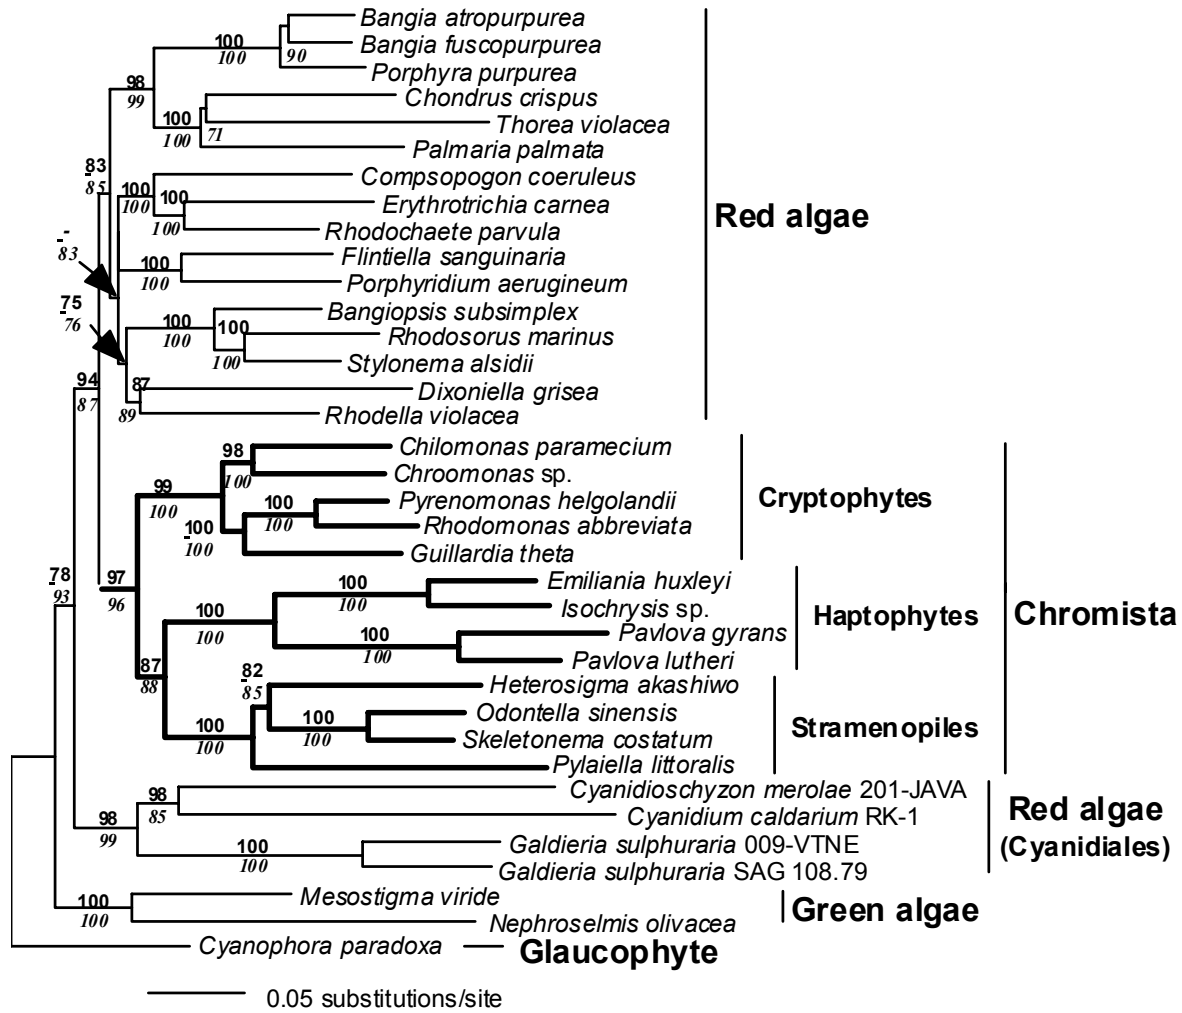

Supplement: pnas_242379899_7.pdf [file pnas_242379899_7.pdf]
